# Supplementary material
Source: Research Square preprint supplement (doi:10.21203/rs.3.rs-8940950/v2)
Supplement: Supplementary file 1 [file ad0b5ca819c75d55b07f27de.pdf]

## Reporting Summary

Nature Portfolio wishes to improve the reproducibility of the work that we publish. This form provides structure for consistency and transparency in reporting. For further information on Nature Portfolio policies, see our [Editorial Policies](#) and the [Editorial Policy Checklist](#).

### Statistics

For all statistical analyses, confirm that the following items are present in the figure legend, table legend, main text, or Methods section.

n/a Confirmed

- The exact sample size ( $n$ ) for each experimental group/condition, given as a discrete number and unit of measurement
- A statement on whether measurements were taken from distinct samples or whether the same sample was measured repeatedly
- The statistical test(s) used AND whether they are one- or two-sided  
*Only common tests should be described solely by name; describe more complex techniques in the Methods section.*
- A description of all covariates tested
- A description of any assumptions or corrections, such as tests of normality and adjustment for multiple comparisons
- A full description of the statistical parameters including central tendency (e.g. means) or other basic estimates (e.g. regression coefficient) AND variation (e.g. standard deviation) or associated estimates of uncertainty (e.g. confidence intervals)
- For null hypothesis testing, the test statistic (e.g.  $F$ ,  $t$ ,  $r$ ) with confidence intervals, effect sizes, degrees of freedom and  $P$  value noted  
*Give  $P$  values as exact values whenever suitable.*
- For Bayesian analysis, information on the choice of priors and Markov chain Monte Carlo settings
- For hierarchical and complex designs, identification of the appropriate level for tests and full reporting of outcomes
- Estimates of effect sizes (e.g. Cohen's  $d$ , Pearson's  $r$ ), indicating how they were calculated

*Our web collection on [statistics for biologists](#) contains articles on many of the points above.*

### Software and code

Policy information about [availability of computer code](#)

Data collection

Data analysis

For manuscripts utilizing custom algorithms or software that are central to the research but not yet described in published literature, software must be made available to editors and reviewers. We strongly encourage code deposition in a community repository (e.g. GitHub). See the Nature Portfolio [guidelines for submitting code & software](#) for further information.

### Data

Policy information about [availability of data](#)

All manuscripts must include a [data availability statement](#). This statement should provide the following information, where applicable:

- Accession codes, unique identifiers, or web links for publicly available datasets
- A description of any restrictions on data availability
- For clinical datasets or third party data, please ensure that the statement adheres to our [policy](#)

Most data used in this study are available either in the literature or in online repositories. Only the microCT data of the mandible U.W. 101-377 that were used for the analysis of the M2 enamel-dentine junction shape was accessed via the Evolutionary Studies Institute, University of the Witwatersrand, South Africa, that curates the fossil and the related data.

## Research involving human participants, their data, or biological material

Policy information about studies with [human participants or human data](#). See also policy information about [sex, gender \(identity/presentation\), and sexual orientation](#) and [race, ethnicity and racism](#).

|                                                                    |                              |
|--------------------------------------------------------------------|------------------------------|
| Reporting on sex and gender                                        | Does not apply to this study |
| Reporting on race, ethnicity, or other socially relevant groupings | Does not apply to this study |
| Population characteristics                                         | Does not apply to this study |
| Recruitment                                                        | Does not apply to this study |
| Ethics oversight                                                   | Does not apply to this study |

Note that full information on the approval of the study protocol must also be provided in the manuscript.

## Field-specific reporting

Please select the one below that is the best fit for your research. If you are not sure, read the appropriate sections before making your selection.

Life sciences     Behavioural & social sciences     Ecological, evolutionary & environmental sciences

For a reference copy of the document with all sections, see [nature.com/documents/nr-reporting-summary-flat.pdf](https://nature.com/documents/nr-reporting-summary-flat.pdf)

## Ecological, evolutionary & environmental sciences study design

All studies must disclose on these points even when the disclosure is negative.

|                          |                                                                                                                                                                                                                         |
|--------------------------|-------------------------------------------------------------------------------------------------------------------------------------------------------------------------------------------------------------------------|
| Study description        | Craniodental and postcranial morphology of the Rising Star hominin material attributed to <i>Homo naledi</i> is examined here to re-evaluate their taxonomy and to eventually explore different evolutionary scenarios. |
| Research sample          | The research sample includes material of <i>H. naledi</i> , and in particular the type specimen DH1, as well as the cranium LES1.                                                                                       |
| Sampling strategy        | Craniodental evidence is analysed based on geometric morphometrics and shape indices. The available/published craniodental and postcranial data of <i>H. naledi</i> was considered in this study                        |
| Data collection          | Data were collected from the literature and/or from online repositories, as well as from the curating institution (Evolutionary Studies Institute, University of the Witwatersrand, South Africa).                      |
| Timing and spatial scale | All data were collected between August 2023 and June 2025.                                                                                                                                                              |
| Data exclusions          | The available data were included in the analyses.                                                                                                                                                                       |
| Reproducibility          | Several tests were conducted to ensure that parallax and/or tilting of specimens in pictures do not affect the results of the analyses.                                                                                 |
| Randomization            | n/a                                                                                                                                                                                                                     |
| Blinding                 | n/a                                                                                                                                                                                                                     |

Did the study involve field work?  Yes     No

## Reporting for specific materials, systems and methods

We require information from authors about some types of materials, experimental systems and methods used in many studies. Here, indicate whether each material, system or method listed is relevant to your study. If you are not sure if a list item applies to your research, read the appropriate section before selecting a response.

## Materials &amp; experimental systems

- n/a  Involved in the study
- Antibodies
- Eukaryotic cell lines
- Palaeontology and archaeology
- Animals and other organisms
- Clinical data
- Dual use research of concern
- Plants

## Methods

- n/a  Involved in the study
- ChIP-seq
- Flow cytometry
- MRI-based neuroimaging

## Palaeontology and Archaeology

- Specimen provenance
- Specimen deposition
- Dating methods
- Tick this box to confirm that the raw and calibrated dates are available in the paper or in Supplementary Information.
- Ethics oversight

Note that full information on the approval of the study protocol must also be provided in the manuscript.

## Plants

- Seed stocks
- Novel plant genotypes
- Authentication
